# Supplementary material for: Utilizing biodegradable poly(butylene succinate) to synergistically toughen polymer blends without sacrificing stiffness
Source: Royal Society of Chemistry journal article supplement (doi:10.1039/c6ra11810k), 2016-01-01
Supplement: c6ra11810k1.pdf [file c6ra11810k1.pdf]

Supporting information

**Using biodegradable poly (butylene succinate) to synergistically toughen polymer blends without sacrificing stiffness**

Zhen Zhang, Jun Zhang\*, Tingsheng Tian

College of Materials Science & Engineering, Nanjing Tech University, Nanjing, 210009, China.

Table S1 Contact angle and surface tension results of different components

| Sample                           | Contact angle (°) |              | Surface tension (mJ/m <sup>2</sup> ) |            |            |
|----------------------------------|-------------------|--------------|--------------------------------------|------------|------------|
|                                  | Distilled Water   | Diodomethane | $\gamma$                             | $\gamma^d$ | $\gamma^p$ |
| PVC/ $\alpha$ -MSAN <sup>1</sup> | 81.6              | 34.7         | 43.04                                | 39.20      | 3.85       |
| CPE <sup>1</sup>                 | 92.6              | 39.1         | 40.07                                | 39.02      | 1.04       |
| PBS <sup>2</sup>                 | 90.4              | 60.6         | 48.60                                | 39.90      | 8.70       |

References

1. Z. Zhang, X. Zhao, S. Wang, J. Zhang and W. Zhang, *RSC Adv.*, 2014, **4**, 60617-60625.
2. D. Wu, L. Yuan, E. Laredo, M. Zhang and W. Zhou, *Industrial & Engineering Chemistry Research*, 2012, **51**, 2290-2298.

\*Corresponding to: Jun Zhang ([zhangjun@njtech.edu.cn](mailto:zhangjun@njtech.edu.cn)); Tel: 86-25-83587264; Fax: 86-25-83240205.
